# Supplementary material for: Fast and low-temperature synthesis of one-dimensional (1D) single-crystalline SbSI microrod for high performance photodetector
Source: Royal Society of Chemistry journal article supplement (doi:10.1039/c5ra01180a), 2015-01-01
Supplement: c5ra01180a1.pdf [file c5ra01180a1.pdf]

## Electronic supplementary information (ESI)

### Fast and Low-Temperature Synthesis of One-Dimensional (1D) Single-Crystalline SbSI Microrod for High Performance Photodetector

Guihuan Chen,<sup>†,‡,§,||</sup> Wei Li,<sup>†,‡,§,||</sup> Yongqiang Yu,<sup>†,‡,§,||</sup> and Qing Yang<sup>\*,†,‡,§,||</sup>

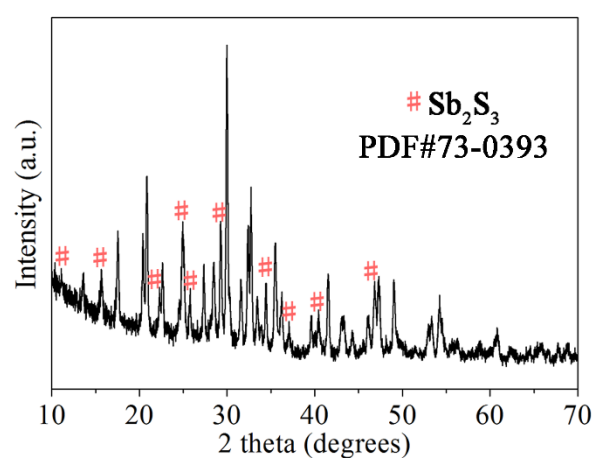

**Figure S1.** XRD pattern of SbSI obtained with impurity of Sb<sub>2</sub>S<sub>3</sub> (#) in a relative low concentration hydrochloric acid solution (0.4 mol/L).

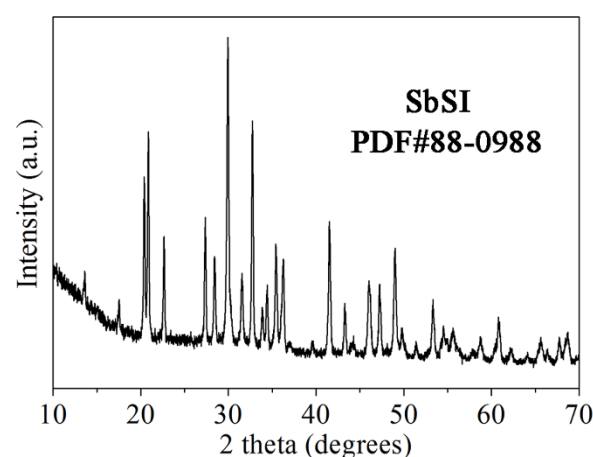

**Figure S2.** XRD pattern of SbSI obtained at 1.8 mol/L of hydrochloric acid solution.

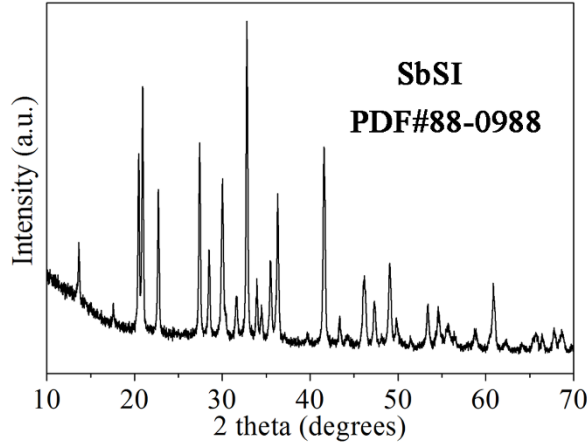

**Figure S3.** XRD pattern of SbSI obtained at 2.4 mol/L of hydrochloric acid solution.

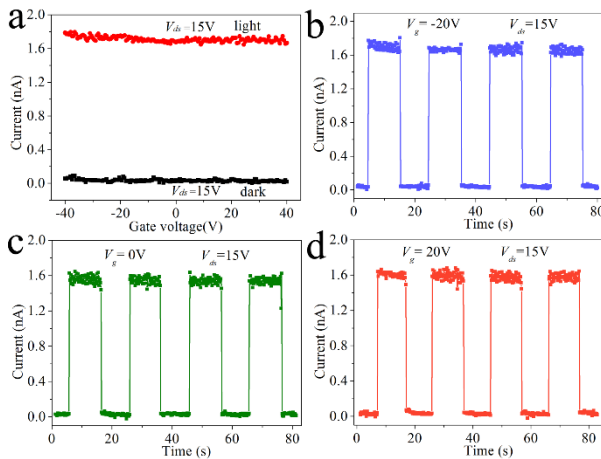

**Figure S4.** (a) Gate voltage dependences of the current under dark state and under light illumination at light intensity of about 32 mW/cm<sup>2</sup> and an applied source-drain voltage ( $V_{ds}$ ) of 15 V, and (b), (c) and (d) the photoresponse of the device at constant source-drain voltage at different gate voltage of -20V, 0V and 20V, respectively, with constant light intensity.

To investigate the dependence of the photoconductivity on gating voltage ( $V_g$ ) under illumination, some additional measurements were conducted, as shown in Figure S4. Figure S4a depicts the typical  $I_{ds}$ - $V_g$  curves of the device under dark and light illumination, respectively.  $V_g$  was applied to the degenerately doped Si substrate, which serves as the global back-gate in the field emission transistor (FET). It is clear that the conduction current of the device as noise level as  $10^{-12}$ A under dark at varied gate voltages from -40 V to 40 V. Meanwhile, the device also exhibits obvious photoresponse characteristics at varied  $V_g$ , and the photocurrent does not show obvious dependence on gating voltage, which can be further seen from the time response properties at different  $V_g$ , as shown in Figure S4 b-d. Therefore, in the current study, the photoconductivity of the device does not show obvious dependence on gating voltage. The weak gate coupling caused by dielectric SiO<sub>2</sub> with a large thickness (~300 nm) and back-gate structure is an important reason for the not-so-good performances.
